# Supplementary material for: The effects of sympathetic activity induced by ice water on blood flow and brachial artery flow-mediated dilatation response in healthy volunteers
Source: PubMed Central journal article supplement (PMC6743752; doi:10.1371/journal.pone.0219814), 2019-09-13

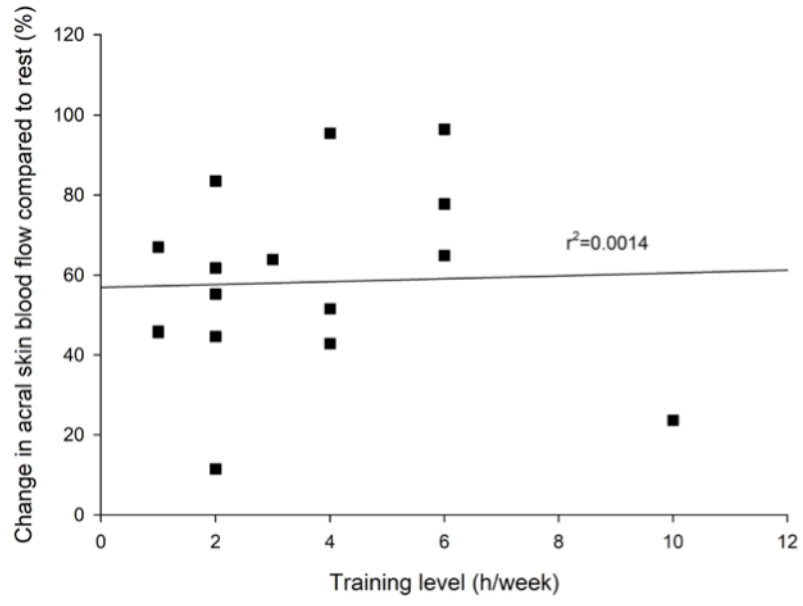

Supplement: pone.0219814.s001.pdf [file pone.0219814.s001.pdf]
